# Supplementary material for: Ocimum flavone Orientin as a countermeasure for thrombocytopenia
Source: PubMed Central journal article supplement (PMC5864743; doi:10.1038/s41598-018-23419-x), 2018-03-22
Supplement: 41598_2018_23419_MOESM1_ESM.pdf [file 41598_2018_23419_MOESM1_ESM.pdf]

## **Ocimum flavone Orientin as a countermeasure for thrombocytopenia**

Marshleen Yadav, Feifei Song, Jason Huang, Arnab Chakravarti, Naduparambil K. Jacob\*

Department of Radiation Oncology,

The Ohio State University Comprehensive Cancer Center

Columbus, OH 43210

\*Correspondence: Naduparambil K. Jacob, PhD

Department of Radiation Oncology

Comprehensive Cancer Center

The Ohio State University

Columbus, OH, USA

Email: [Naduparambil.Jacob@osumc.edu](mailto:Naduparambil.Jacob@osumc.edu)

Phone: 614-685-4246

Fax: 614-366-1938

## Supplementary Figure Legends

**Supplementary Figure S1:** (a) Plateletcrit (PCT) measurement in Orientin pre and post IR treatment in mice exhibited a noticeable increase at day 17 and 21 compared with IR alone. Dot plot shows relative levels in comparison to irradiated animals. Statistical significance was calculated using a Student *t*-test. (b) Lymphoid and myeloid cells in mice peripheral blood post 6 weeks of sub-lethal irradiation. Cells were stained with primary antibodies of anti mouse-Ly6G, Mac1, CD3 and B220 for flow cytometry. Bar shows cell proportion compared to irradiated group and expressed as mean  $\pm$ SD of 4 mice.

**Supplementary Figure S2: Megakaryocytes surface protein CD41 expression in Orientin treated and irradiated mice.** Flow cytometry of bone marrow cells at day 9 and 18 post irradiation. Co-expression of megakaryocyte surface marker CD41 with stem cells marker c-Kit<sup>+</sup> (a) and platelet marker CD62P (b). Erythroid cells (Ter119<sup>+</sup>) (c). Mononuclear cells were isolated from mouse whole bone marrow and stained with anti-mouse primary antibodies of CD41-PE, CD117-APC, CD62P-FITC and Ter119-PE. Bar shows relative expression compared to vehicle treated and unirradiated controls expressed as mean  $\pm$ SD of 6 mice. Statistical significance was calculated using a Student *t*-test.

**Supplementary Figure S3:** Colony assay in c-Kit<sup>+</sup> cells purified from mouse bone marrow of different treatment groups at day 9 post irradiation. Lin<sup>-</sup>c-Kit<sup>+</sup> cells ( $2 \times 10^3$  cells/ml) were cultured in triplicates on mouse methylcellulose semi-solid medium supplemented with cytokine cocktail. CFU-GM, BFU-E and CFU-GEMM colonies were scored on day 7 by standard morphologic criteria. Bar shows average colony number generated from stem cells and compared to control untreated and unirradiated controls expressed as mean  $\pm$ SD of 4 mice.

**Supplementary Figure S4: Effect of Orientin on apoptosis in irradiated human hematopoietic stem cells (CD34<sup>+</sup>).** CD34<sup>+</sup> cells purified from healthy donor's PBMCs (n=3) via Ficoll-Paque density gradient method followed by magnetic bead sorting. Cells were treated with or without Orientin in a serum free expansion medium (SFEM) supplemented with 100ng/ml cytokine cocktail (CC100) were treated with various concentrations of Orientin (0.1 to 5 $\mu$ M) 24 h before 4 Gy irradiation (X-ray). Cells were harvested after 24 h, washed and evaluated for live cell fractions and apoptotic cells by FACS using Annexin V staining.

# Supplementary Figure S1

(a)

## Plateletcrit (PCT)

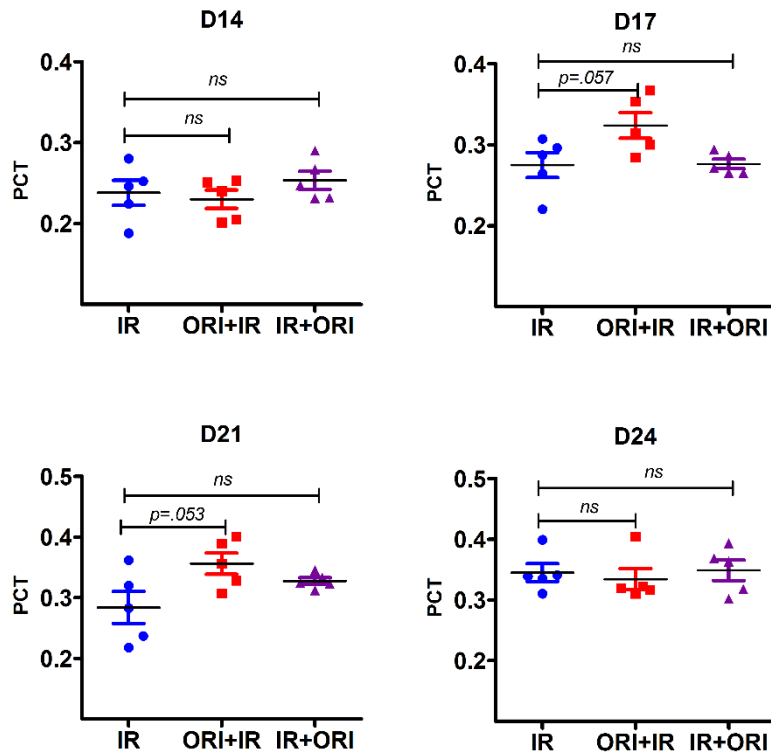

(b)

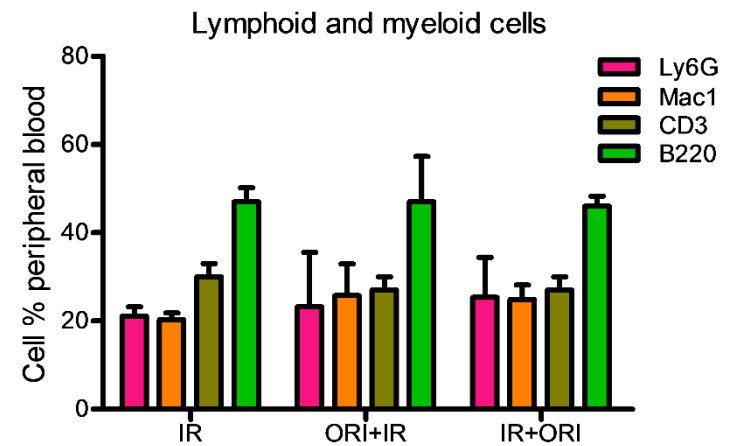

# Supplementary Figure S2

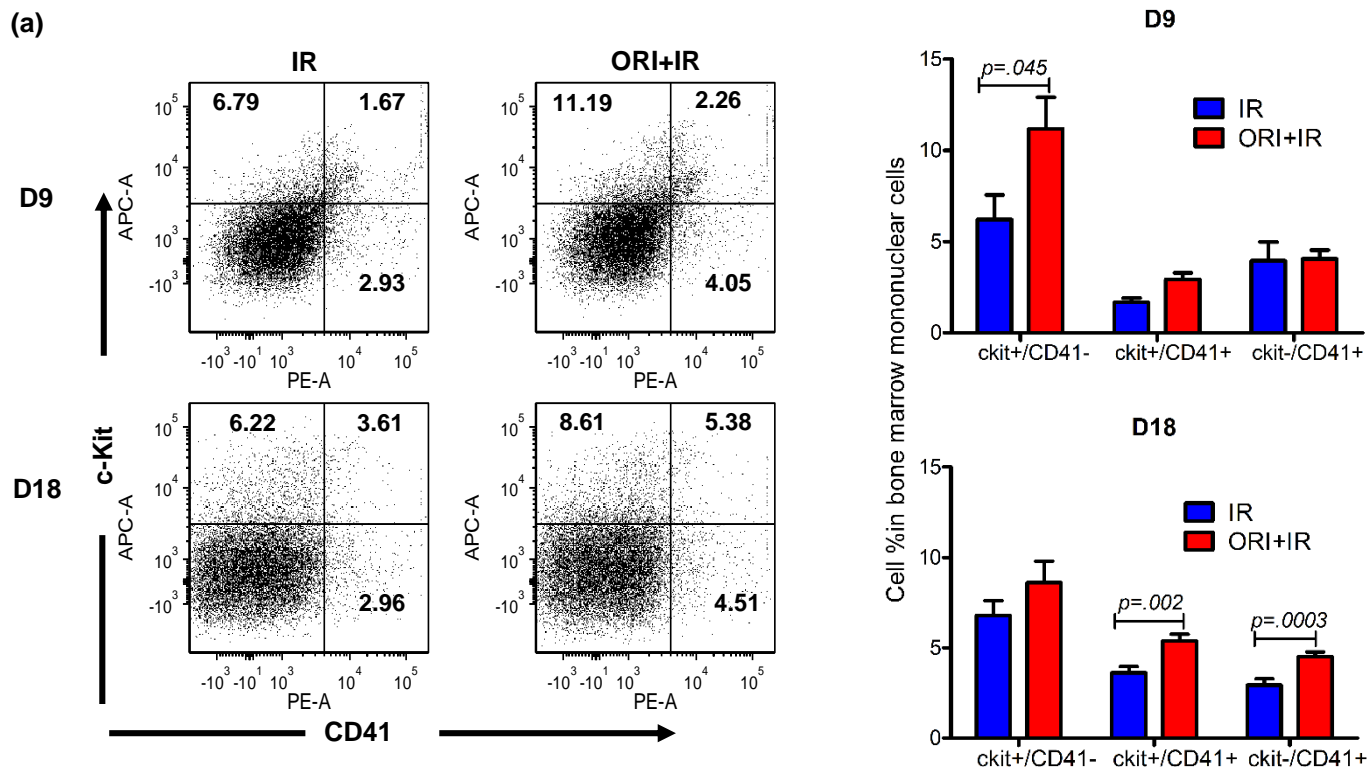

# Supplementary Figure S2 contd.

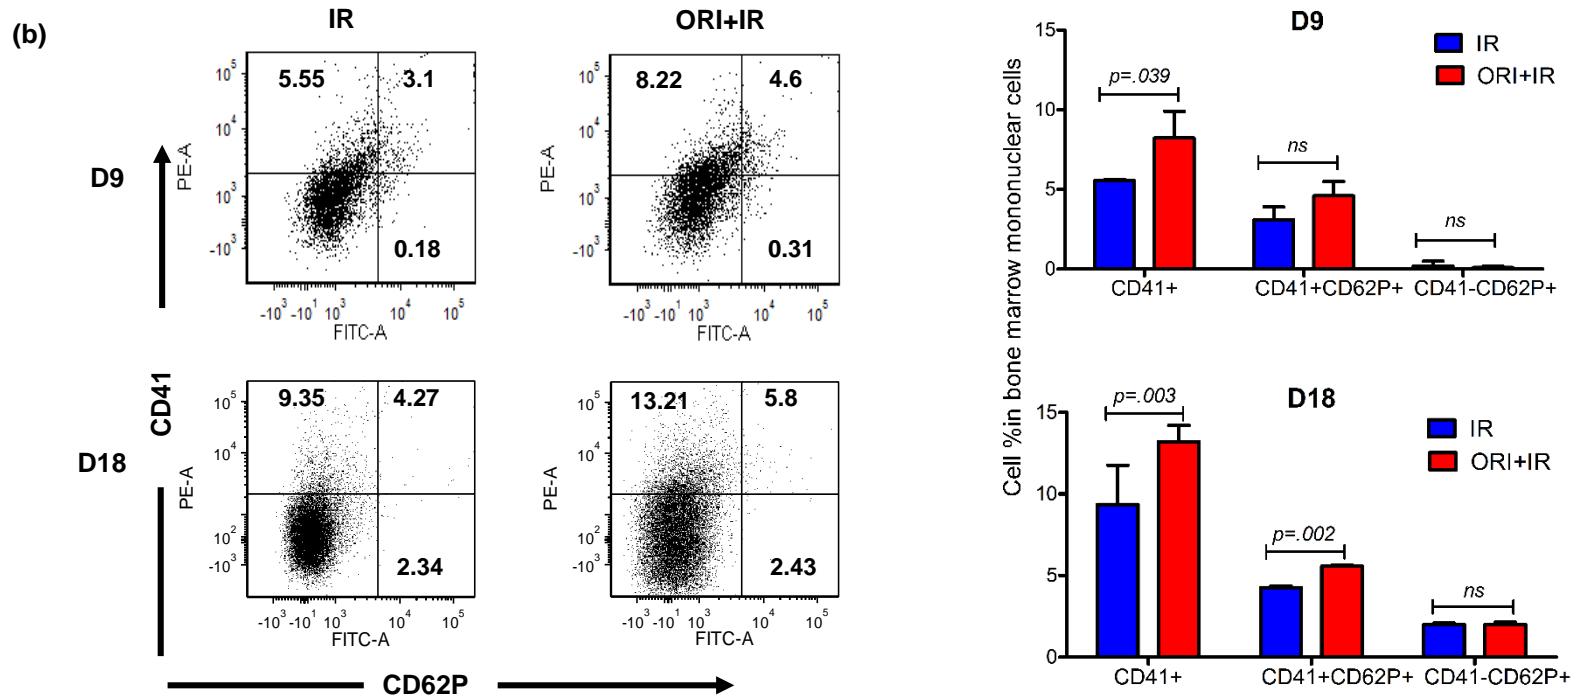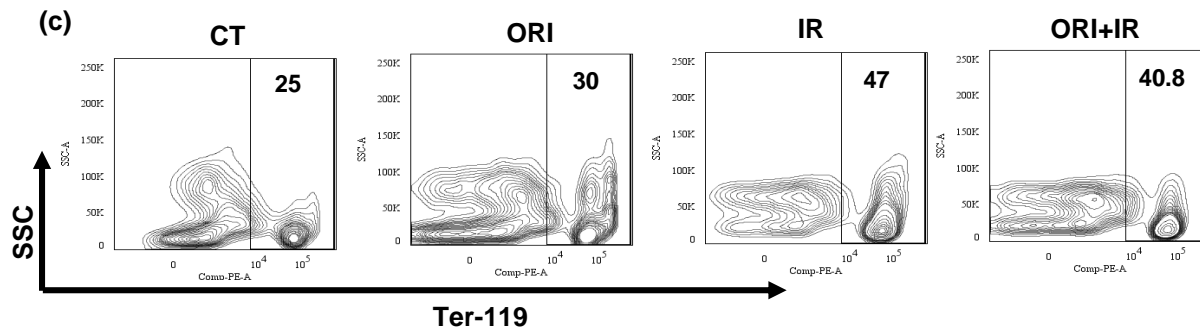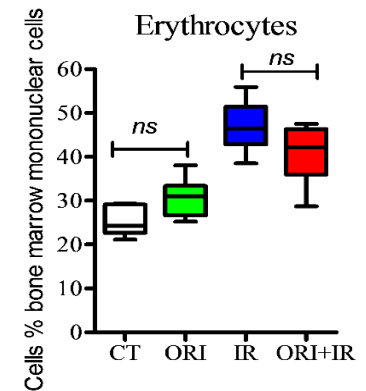

# Supplementary Figure S3

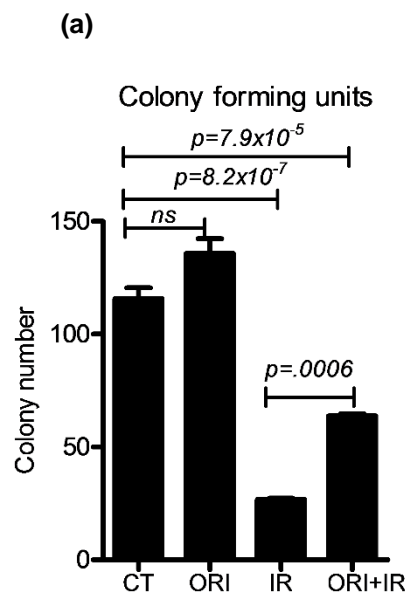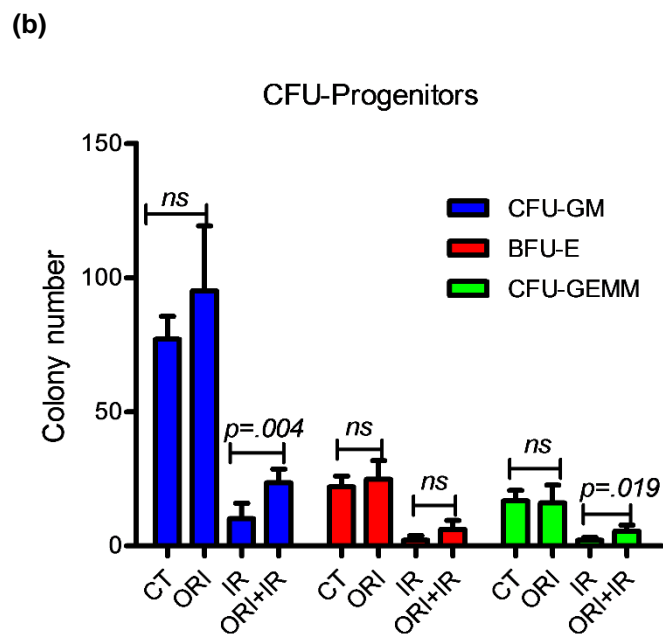

# Supplementary Figure S4

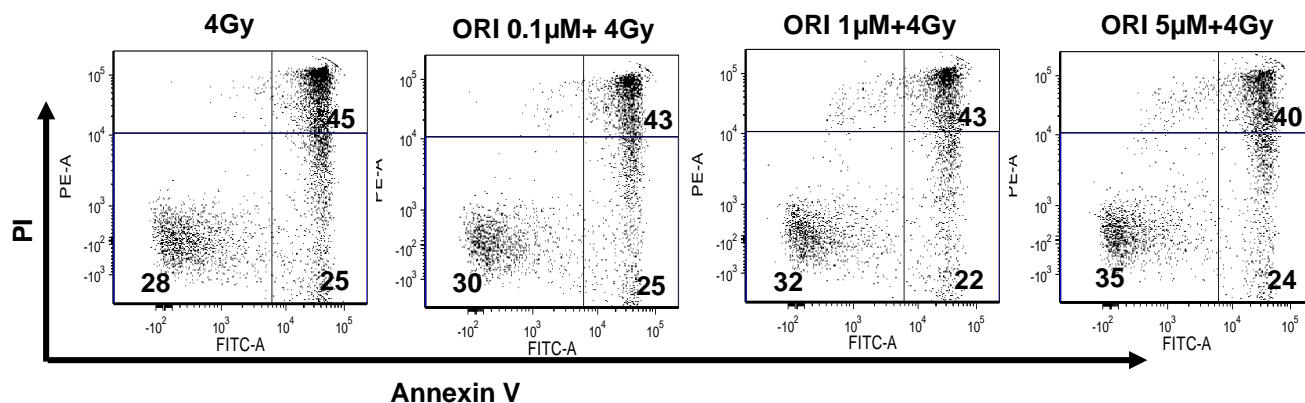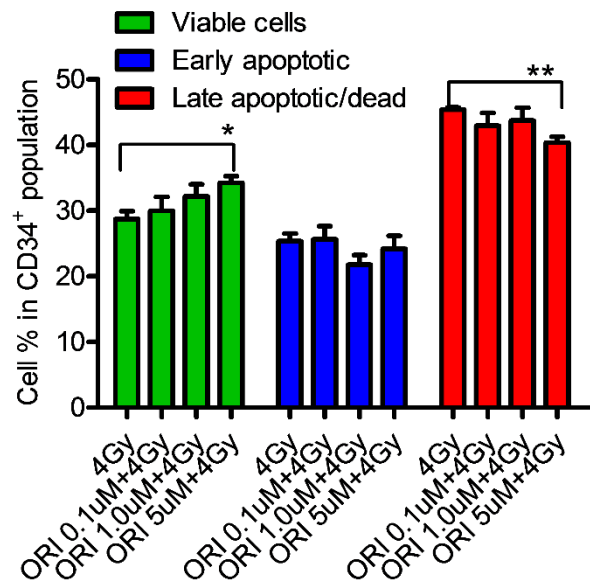



Supplementary Table 3: Orientin and radiation doses

| <b>Group</b>                    | <b>Dose</b>       | <b>Injections</b>                                                               |
|---------------------------------|-------------------|---------------------------------------------------------------------------------|
| Control (CT)                    | PBS alone         | Subcutaneous, twice, 24h and 3h before Sham (0Gy)                               |
| Orientin alone (ORI)            | 1mg/kg            | Subcutaneous, twice, 24h and 3h before Sham (0Gy)                               |
| Irradiation alone (IR)          | 6Gy               | Acute single dose, Total Body Irradiation (TBI) ( <sup>137</sup> Cs gamma rays) |
| Orientin + Irradiation (ORI+IR) | 1mg/kg+6Gy (Pre)  | Subcutaneous, twice, 24h and 3h before 6Gy TBI                                  |
| Irradiation + Orientin (IR+ORI) | 6Gy+1mg/kg (Post) | Subcutaneous, once, 3h and 24h after 6Gy TBI                                    |

Supplementary Table 4: Tulsi and radiation doses

| <b>Group</b>                     | <b>Dose</b>                                                                                                  |
|----------------------------------|--------------------------------------------------------------------------------------------------------------|
| Control (CT)                     | standard powdered rodent chow, every day for 10 days                                                         |
| Tulsi alone (Tulsi)              | 10mg Tulsi/g standard diet (1%) ad libitum, every day for 10 days                                            |
| Irradiation (IR)                 | 6Gy acute single dose Total Body Irradiation (TBI)- <sup>137</sup> Cs Gamma rays                             |
| Tulsi + Irradiation (Tulsi + IR) | 10mg Tulsi/g standard diet (1%), ad libitum for 14 days + 6Gy TBI (Pre)<br><br>Started three days before TBI |
| Irradiation + Tulsi (IR + Tulsi) | 6Gy TBI + 10mg Tulsi/g standard diet (1%), ad libitum for 14 days (Post)<br><br>Started 3 hrs after TBI      |

Supplementary Table 5: List of mouse and human Flow cytometry antibodies

|                                                   |         |             |
|---------------------------------------------------|---------|-------------|
| APC anti-Mouse CD117 (Clone 2B8)                  | #561074 | BD          |
| Sca-1 FITC anti-Mouse Ly-6A/E (Clone E13-161.7)   | #561077 | Biosciences |
| PE anti-Mouse CD41 (Clone MWReg30)                | #561850 |             |
| FITC conjugated anti-mouse CD62P                  | #561923 |             |
| PE conjugated anti mouse Ter119                   | #561071 |             |
| PE-Cy-7 anti-human CD34 (clone 581)               | #560710 |             |
| Pacblue anti-human CD38 (clone HIT <sub>2</sub> ) | #561378 |             |
| FITC anti-human CD10                              | #340925 |             |
| PE anti-human CD135-PE                            | #558996 |             |
| APC anti-human CD45RA(clone HI100)                | #561884 |             |
| PE anti-human CD41-PE (clone HIP8)                | #560979 |             |
| FITC Annexin V Apoptosis Detection Kit            | #556547 |             |

Supplementary Table 6: List of TaqMan probes

| <b>TaqMan Probes</b> |                | <b>Company</b>           |
|----------------------|----------------|--------------------------|
| Gata1                | #Mm01352636_m1 | Thermo Fisher Scientific |
| Pf4                  | #Mm00451315_g1 |                          |
| Mpl                  | #Mm00440310_m1 |                          |
| Myb                  | #Mm00501741_m1 |                          |
| Tek                  | #Mm01256904_m1 |                          |
| Nf-e2                | #Mm00801891_m1 |                          |
| Gflb1                | #Mm00492318_m1 |                          |
| Runx1                | #Mm01213404_m1 |                          |
